# Supplementary material for: Impact of Autumn-Winter Wind Speed and Low Temperatures on Acute Coronary Syndrome: A 5-Year Single-Center Study in Beijing
Source: Research Square preprint supplement (doi:10.21203/rs.3.rs-7017475/v1), 2025-07-27
Supplement: Supplementary file 1 [file d5339a8638ccfa56f33498ab.docx]

Dear Editor,

Greetings!

In the interest of maintaining the conciseness and readability of the manuscript, we have included only the tables with positive results in the main text. The complete set of tables is meticulously organized in the supplementary materials, with the tables in both the main text and supplementary materials following a consistent order for ease of reference:

Supplementary Table S1: Monthly Characteristics of Meteorological Factors;

Supplementary Table S2: Correlation Analysis among Meteorological Factors (Note: *indicates p<0.05, **indicates p<0.01.);

Supplementary Table S3: Seasonal Correlation Analysis of ACS Cases and Daily Meteorological Factors (Note: *p<0.05, **p<0.01);

Supplementary Table S4: T-test Analysis of Meteorological Factors Between ACS Incidence and Non-incidence Groups by Season (Note: *indicates p<0.05.);

Supplementary Table S5: Effects of Meteorological Factors on ACS Events (Note: Model 1 - Unadjusted; Model 2 - Adjusted for Other Meteorological Variables; *p<0.05.);

Supplementary Table S6: Sensitivity Analysis of Meteorological Factors in Autumn and Winter(Note: Model 1-unadjusted; Model 2-adjusted for other meteorological variables; * indicates p<0.05.);

Supplementary Table S7: Analysis of Lagged Effects of Meteorological Factors (Note: *p<0.05.)

Table S1. Monthly Characteristics of Meteorological Factors

| Month | Average Air Pressure (hPa) | Average Wind Speed (m/s) | Average Temperature (℃) | Average Maximum Temperature (℃) | Diurnal Temperature difference (℃) | Average Minimum Temperature (℃) | Average Precipitation (mm/24h) |
| --- | --- | --- | --- | --- | --- | --- | --- |
| January | 1018.53±67.84 | 1.18±0.68 | -1.51±3.02 | 3.8±3.63 | 9.34±2.89 | -5.54±3.39 | 0.01±0.05 |
| February | 1014.91±81.56 | 1.24±0.61 | 1.06±3.63 | 6.76±4.99 | 10.11±3.82 | -3.35±3.07 | 0.02±0.09 |
| March | 978.15±189.33 | 1.22±0.61 | 9.39±4.31 | 16.21±5.04 | 11.96±3.83 | 4.25±3.75 | 0.04±0.23 |
| April | 985.78±154.81 | 1.26±0.48 | 15.41±4.41 | 21.73±4.48 | 12.88±3.97 | 8.84±3.41 | 0.8±2.52 |
| May | 1003.22±5.05 | 1.19±0.45 | 22.18±3.19 | 28.39±4.15 | 13.3±4.34 | 15.09±3.09 | 0.53±2.54 |
| June | 957.13±202.92 | 0.99±0.4 | 24.83±6.04 | 32.14±3.42 | 12.28±3.64 | 19.86±2.99 | 0.86±3.11 |
| July | 999.78±3.48 | 0.81±0.26 | 27.08±2.2 | 32.15±2.78 | 9.52±3.02 | 22.63±2.06 | 5.24±11.98 |
| August | 996.78±68.27 | 0.87±0.27 | 26.52±2.9 | 32.05±2.85 | 10.3±2.85 | 21.75±2.46 | 2.72±8.66 |
| September | 954.39±227.52 | 0.78±0.36 | 20.72±5.66 | 28.03±3.23 | 11.53±2.75 | 16.49±2.87 | 3.34±16.01 |
| October | 1002.57±118.5 | 0.78±0.41 | 12.33±2.84 | 18.25±2.8 | 10.34±3.34 | 7.92±3.08 | 1.45±7.3 |
| November | 997.14±152.87 | 0.91±0.53 | 5.54±3.69 | 11.32±4.65 | 10.01±3.06 | 1.31±3.41 | 0.11±1.67 |
| December | 1023.62±5.92 | 1.18±0.59 | -0.36±2.99 | 4.87±3.71 | 9.19±2.7 | -4.32±2.77 | 0.02±0.07 |

Table S2. Correlation Analysis among Meteorological Factors （ Note:*indicates p<0.05, **indicates p<0.01.）

| Meteorological Factors | Average Air Pressure (hPa) | Average Wind Speed (m/s) | Average Temperature (℃) | Average Maximum Temperature (℃) | Diurnal Temperature difference (℃) | Average Minimum Temperature (℃) | Average Precipitation (mm/24h) |
| --- | --- | --- | --- | --- | --- | --- | --- |
| Average Air Pressure (hPa) | 1 |  |  |  |  |  |  |
| Average Wind Speed (m/s) | 0.2696** | 1 |  |  |  |  |  |
| Average Temperature (℃) | 0.08925** | -0.16155** | 1 |  |  |  |  |
| Average Maximum Temperature (℃) | -0.1147** | -0.22814** | 0.96464** | 1 |  |  |  |
| Diurnal Temperature difference (℃) | -0.1033** | -0.22609** | 0.95653** | 0.94633** | 1 |  |  |
| Average Minimum Temperature (℃) | -0.05901** | -0.05849** | 0.24578** | 0.3841** | 0.06506** | 1 |  |
| Average Precipitation (mm/24h) | 0.01598* | -0.06995** | 0.15036** | 0.12318** | 0.19879** | -0.18095** | 1 |

Table S3. Seasonal Correlation Analysis of ACS Cases and Daily Meteorological Factors (Note: *p<0.05, **p<0.01.)

|  | Total cases | **Number of cases in spring** | **Number of cases in Summer** | **Number of cases in Autumn** | **Number of cases in Winter** |
| --- | --- | --- | --- | --- | --- |
| Air Pressure (hPa) | -0.025 | -0.08 | -0.007 | 0.051 | 0.082 |
| Wind Speed (m/s) | -0.018 | -0.038 | 0.025 | 0.129** | 0.089* |
| Average Temperature (℃) | 0.018 | 0.078 | 0.004 | 0.103* | 0.097* |
| Daily aximumTemperature(℃) | 0.024 | 0.084 | 0.025 | -0.076 | -0.095 |
| Daily Minimum emperature(℃) | 0.02 | 0.061 | 0.024 | 0.095* | 0.116* |
| Diurnal Temperature difference(℃) | 0.009 | 0.047 | -0.011 | 0.012 | -0.025 |
| Precipitation(mm/24h) | -0.008 | -0.044 | -0.02 | 0.006 | -0.001 |

Table S4. T-test Analysis of Meteorological Factors Between ACS Incidence and Non-incidence Groups by Season（Note: *indicates p<0.05.）

| **Season** | **Meteorological Factors** | **No ACS occurrence** | **ACS occurrence** | **T** | ***P*** |
| --- | --- | --- | --- | --- | --- |
| **total** | Air Pressure(hPa) | 1002.63±98.29 | 998.06±117.22 | 0.84 | 0.402 |
|  | Wind Speed(m/s) | 1.05±0.51 | 1.03±0.52 | 0.73 | 0.4625 |
|  | Average Temperature(℃) | 13.43±10.86 | 13.87±10.95 | -0.81 | 0.4153 |
|  | Daily Maximum Temperature(℃) | 19.2±11.1 | 19.73±11.2 | -0.98 | 0.3289 |
|  | Daily Minimum Temperature(℃) | 8.58±10.35 | 9.03±10.41 | -0.87 | 0.3839 |
|  | Diurnal Temperature difference(℃) | 10.62±3.54 | 10.71±3.67 | -0.51 | 0.6078 |
|  | Precipitation(mm/24h) | 1.57±5.83 | 1.94±8.06 | -0.89 | 0.3761 |
| **Spring** | Air Pressure(hPa) | 1010.16±7.42 | 995.59±116.35 | 1.59 | 0.1135 |
|  | Wind Speed(m/s) | 1.28±0.49 | 1.23±0.51 | 0.88 | 0.3792 |
|  | Average Temperature(℃) | 14.94±6.39 | 15.87±6.44 | -1.48 | 0.1397 |
|  | Daily Maximum Temperature(℃) | 21.1±6.76 | 22.19±6.71 | -1.66 | 0.0984 |
|  | Daily Minimum Temperature(℃) | 8.81±5.83 | 9.55±5.59 | -1.34 | 0.1809 |
|  | Diurnal Temperature difference(℃) | 12.29±3.91 | 12.64±4.17 | -0.87 | 0.3864 |
|  | Precipitation(mm/24h) | 0.78±2.98 | 0.62±2.65 | 0.53 | 0.594 |
| **Summer** | Air Pressure(hPa) | 987.11±115.2 | 984.25±126.28 | 0.23 | 0.8151 |
|  | Wind Speed(m/s) | 0.88±0.33 | 0.89±0.32 | -0.18 | 0.8545 |
|  | Average Temperature(℃) | 26.19±4.11 | 26.09±4.23 | 0.25 | 0.8017 |
|  | Daily Maximum Temperature(℃) | 31.94±3.28 | 31.9±3 | 0.12 | 0.9015 |
|  | Daily Minimum Temperature(℃) | 21.53±2.64 | 21.5±2.87 | 0.1 | 0.9226 |
|  | Diurnal Temperature difference(℃) | 10.41±3.38 | 10.4±3.34 | 0.03 | 0.9735 |
|  | Precipitation(mm/24h) | 3.04±7.03 | 4.39±12.7 | -1.2 | 0.2309 |
| **Autumn** | Air Pressure(hPa) | 1008.2±81.86 | 998.61±130.64 | 0.83 | 0.4057 |
|  | Wind Speed(m/s) | 0.83±0.45 | 0.92±0.45 | 2.12 | 0.0345* |
|  | Average Temperature(℃) | 14.1±7.74 | 12.51±7.38 | 2.14 | 0.0328* |
|  | Daily Maximum Temperature(℃) | 19.78±8.01 | 17.53±7.74 | 1.61 | 0.047* |
|  | Daily Minimum Temperature(℃) | 9.46±7.34 | 8.11±7 | 1.92 | 0.055 |
|  | Diurnal Temperature difference(℃) | 10.32±3.1 | 10.42±3.24 | -0.32 | 0.7461 |
|  | Precipitation(mm/24h) | 1.3±7.06 | 1.24±5.26 | 0.1 | 0.9174 |
| **Winter** | Air Pressure(hPa) | 1004.09±134.32 | 1015.52±86.82 | -1.1 | 0.2737 |
|  | Wind Speed(m/s) | 1.12±0.62 | 1.41±0.63 | -2.38 | 0.0145* |
|  | Average Temperature(℃) | 0.28±3.67 | -0.46±3.28 | 2.21 | 0.0273* |
|  | Daily Maximum Temperature(℃) | 5.78±4.69 | 4.82±4.12 | 2.28 | 0.0232* |
|  | Daily Minimum Temperature(℃) | -3.72±3.54 | -4.47±3.15 | 2.34 | 0.0198* |
|  | Diurnal Temperature difference(℃) | 9.5±3.12 | 9.29±3.01 | 0.71 | 0.4755 |
|  | Precipitation(mm/24h) | 0±0.01 | 0.01±0.07 | -0.72 | 0.4729 |

Table S5. Effects of Meteorological Factors on ACS Events (Note: Model 1 - Unadjusted; Model 2 - Adjusted for Other Meteorological Variables; *p<0.05)

| **Season** | **Meteorological Factors** |  | **Model 1** | |  | **Model 2** | |
| --- | --- | --- | --- | --- | --- | --- | --- |
|  | **OR** | ***P*** |  | **OR** | ***P*** |
| **Total** | Air Pressure (hPa) |  | 1.000(0.999,1.001) | 0.4049 |  | 1.000(0.998,1.001) | 0.6708 |
|  | Wind Speed (m/s) |  | 0.933(0.775,1.123) | 0.4623 |  | 0.962(0.791,1.170) | 0.6992 |
|  | Average Temperature (℃) |  | 1.004(0.995,1.013) | 0.4151 |  | 1.001(0.927,1.081) | 0.9817 |
|  | Daily Maximum Temperature (℃) |  | 1.004(0.996,1.013) | 0.3287 |  | 1.004(0.953,1.057) | 0.8846 |
|  | Daily Minimum Temperature(℃) |  | 1.004(0.995,1.013) | 0.3837 |  | 0.999(0.955,1.046) | 0.9758 |
|  | Diurnal Temperature difference(℃) |  | 1.007(0.981,1.034) | 0.608 |  | — | — |
|  | Precipitation(mm/24h) |  | 0.996(0.982,1.011) | 0.6143 |  | 0.995(0.981,1.01) | 0.5194 |
| **Spring** | Air Pressure (hPa) |  | 0.980(0.955,1.006) | 0.138 |  | 0.990(0.960,1.021) | 0.5239 |
|  | Wind Speed (m/s) |  | 0.844(0.578,1.232) | 0.3786 |  | 0.938(0.633,1.392) | 0.752 |
|  | Average Temperature (℃) |  | 1.023(0.993,1.054) | 0.1399 |  | 1.243(0.978,1.580) | 0.0757 |
|  | Daily Maximum Temperature (℃) |  | 1.024(0.996,1.054) | 0.0988 |  | 0.892(0.762,1.044) | 0.1533 |
|  | Daily Minimum Temperature(℃) |  | 1.023(0.989,1.059) | 0.1809 |  | 0.909(0.808,1.022) | 0.1097 |
|  | Diurnal Temperature difference(℃) |  | 1.021(0.974,1.070) | 0.3856 |  | — | — |
|  | Precipitation(mm/24h) |  | 1.003(0.903,1.081) | 0.94 |  | 1.014(0.938,1.096) | 0.7299 |
| **Summer** | Air Pressure (hPa) |  | 1(0.998,1.001) | 0.8149 |  | 1.001(0.994,1.008) | 0.8638 |
|  | Wind Speed (m/s) |  | 1.059(0.577,1.944) | 0.8541 |  | 1.175(0.599,2.307) | 0.6388 |
|  | Average Temperature (℃) |  | 0.994(0.948,1.042) | 0.8013 |  | 0.966(0.747,1.248) | 0.7893 |
|  | Daily Maximum Temperature (℃) |  | 0.996(0.935,1.061) | 0.9013 |  | 1.001(0.841,1.190) | 0.9949 |
|  | Daily Minimum Temperature(℃) |  | 0.997(0.929,1.069) | 0.9224 |  | 1.027(0.903,1.168) | 0.6869 |
|  | Diurnal Temperature difference(℃) |  | 0.999(0.943,1.059) | 0.9734 |  | — | — |
|  | Precipitation(mm/24h) |  | 0.987(0.970,1.004) | 0.1369 |  | 0.985(0.967,1.003) | 0.1078 |
| **Autumn** | Air Pressure (hPa) |  | 0.999(0.997,1.001) | 0.4184 |  | 1.002(0.998,1.007) | 0.2805 |
|  | Wind Speed (m/s) |  | 1.634(1.213,1.911)* | 0.0163 |  | 1.213(1. 014,1.422)* | 0.0319 |
|  | Average Temperature (℃) |  | 0.872(0.817,0.938)* | 0.0134 |  | 0.861(0.589,0.989)* | 0.0387 |
|  | Daily Maximum Temperature (℃) |  | 0.880(0.756,0.934)* | 0.0473 |  | 0.899(0.715,0.974)* | 0.0316 |
|  | Daily Minimum Temperature(℃) |  | 0.944(0.857,1.091) | 0.0556 |  | 1.079(0.906,1.286) | 0.3923 |
|  | Diurnal Temperature difference(℃) |  | 1.010(0.951,1.074) | 0.7451 |  | — | — |
|  | Precipitation(mm/24h) |  | 1.014(0.975,1.054) | 0.4877 |  | 1.023(0.981,1.068) | 0.2898 |
| **Winter** | Air Pressure (hPa) |  | 1.001(0.999,1.003) | 0.291 |  | 1.000(0.998,1.002) | 0.7271 |
|  | Wind Speed (m/s) |  | 1.386(1.140,1.758)* | 0.0155 |  | 1.274(1.038,1.645)* | 0.0305 |
|  | Average Temperature (℃) |  | 0.839(0.687,0.913)* | 0.0128 |  | 0.871(0.663,0.915)* | 0.0299 |
|  | Daily Maximum Temperature (℃) |  | 0.951(0.910,0.993)* | 0.0243 |  | 0.920(0.796,1.065) | 0.2646 |
|  | Daily Minimum Temperature(℃) |  | 0.933(0.879,0.989)* | 0.0109 |  | 0.914(0.840,0.951)* | 0.0243 |
|  | Diurnal Temperature difference(℃) |  | 0.978(0.918,1.040) | 0.4747 |  | — | — |
|  | Precipitation(mm/24h) |  | 1.432(0.475,2.029) | 0.4789 |  | 1.314(0.375,2.631) | 0.4593 |

Supplementary Table S6. Sensitivity Analysis of Meteorological Factors in Autumn and Winter（Note: Model 1-unadjusted; Model 2-adjusted for other meteorological variables; * indicates p<0.05.）

| **Meteorological Factors** |  |  | **Model 1** | | **Model 2** |
| --- | --- | --- | --- | --- | --- |
|  |  | **OR** |  | **OR** |
| Air Pressure (hPa) | **T1** |  | 1 |  | 1 |
|  | **T2** |  | 1.335(0.833,2.141) |  | 1.131(0.691,1.85) |
|  | **T3** |  | 1.433(0.891,2.303) |  | 1.136(0.636,2.027) |
| Wind Speed (m/s) | **T1** |  | 1 |  | 1 |
|  | **T2** |  | 1.258(1.014,1.684)* |  | 1.236(0.987,1.936) |
|  | **T3** |  | 1.532(1.319,1.888)* |  | 1.414(1.127,1.871)* |
| Average Temperature (℃) | **T1** |  | 1 |  | 1 |
|  | **T2** |  | 0.99(0.607,1.618) |  | 0.982(0.195,3.209) |
|  | **T3** |  | 0.626(0.449,0.864) |  | 0.737(0.469,0.986)* |
| Daily Maximum Temperature (℃) | **T1** |  | 1 |  | 1 |
|  | **T2** |  | 1.132(0.695,1.842) |  | 0.947(0.486,1.846) |
|  | **T3** |  | 0.717(0.548,0.947)* |  | 0.945(0.153,2.128) |
| Daily Minimum Temperature(℃) | **T1** |  | 1 |  | 1 |
|  | **T2** |  | 0.719(0.44,1.173) |  | 0.727(0.381,1.39) |
|  | **T3** |  | 0.587(0.363,0.913)* |  | 0.62(0.365,0.969)* |
| Diurnal Temperature difference(℃) | **T1** |  | 1 |  | 1 |
|  | **T2** |  | 0.785(0.493,1.252) |  | 0.782(0.456,1.339) |
|  | **T3** |  | 1.021(0.639,1.63) |  | 1.118(0.557,2.243) |
| Precipitation(mm/24h) | **NO** |  | 1 |  | 1 |
|  | **Yes** |  | 0.815(0.374,1.777) |  | 0.842(0.051,14.017) |

Table S7. Analysis of Lagged Effects of Meteorological Factors (Note: *p<0.05.)

| **Season** | **Lag time** | **AP(hpa)** |  | **WS(m/s)** |  | **AT(℃)** |  | **Atmax(℃)** |  | **Atmin(℃)** |  | **TD(℃)** |  | **Rain(mm/24h)** |
| --- | --- | --- | --- | --- | --- | --- | --- | --- | --- | --- | --- | --- | --- | --- |
| **OR** |  | **OR** |  | **OR** |  | **OR** |  | **OR** |  | **OR** |  | **OR** |
| **total** | **Lag1** | 1(0.999,1.001) |  | 1.013(0.841,1.221) |  | 1.006(0.997,1.015) |  | 1.004(0.996,1.013) |  | 1.007(0.998,1.016) |  | 0.987(0.961,1.014) |  | 1.012(0.996,1.029) |
|  | **Lag2** | 1(0.999,1.001) |  | 1.111(1.075,1274)* |  | 1.006(0.997,1.015) |  | 1.004(0.995,1.013) |  | 1.008(0.998,1.017) |  | 0.976(0.95,1.002) |  | 1.017(0.999,1.035) |
|  | **Lag3** | 1(1,1.001) |  | 0.937(0.778,1.127) |  | 1.008(0.999,1.016) |  | 1.005(0.996,1.014) |  | 1.007(0.998,1.017) |  | 0.988(0.962,1.014) |  | 1.009(0.993,1.025) |
|  | **Lag4** | 1(0.999,1.001) |  | 0.876(0.729,1.053) |  | 1.006(0.997,1.014) |  | 1.005(0.996,1.014) |  | 1.007(0.997,1.016) |  | 0.994(0.968,1.021) |  | 1.001(0.986,1.015) |
|  | **Lag5** | 1(1,1.001) |  | 0.902(0.75,1.085) |  | 1.005(0.996,1.014) |  | 1.005(0.997,1.014) |  | 1.005(0.996,1.014) |  | 1.013(0.986,1.04) |  | 1.004(0.989,1.019) |
| **Autumn** | **Lag1** | 1(0.998,1.002) |  | 0.85(0.554,1.304) |  | 0.975(0.95,1.001) |  | 0.979(0.955,1.004) |  | 0.977(0.95,1.004) |  | 0.989(0.93,1.051) |  | 0.991(0.962,1.02) |
|  | **Lag2** | 1(0.998,1.002) |  | 1.237(1.093,1.393)* | | 0.984(0.959,1.01) |  | 0.979(0.955,1.004) |  | 0.986(0.959,1.013) |  | 0.945(0.888,1.006) |  | 1.042(0.979,1.108) |
|  | **Lag3** | 0.999(0.997,1.001) |  | 1.138(0.732,1.769) |  | 0.983(0.958,1.009) |  | 0.982(0.957,1.007) |  | 0.991(0.964,1.019) |  | 0.934(0.877,0.994) |  | 1.019(0.975,1.064) |
|  | **Lag4** | 1(0.998,1.002) |  | 0.834(0.542,1.281) |  | 0.981(0.956,1.007) |  | 0.981(0.957,1.006) |  | 0.978(0.951,1.005) |  | 1(0.94,1.063) |  | 1.004(0.972,1.038) |
|  | **Lag5** | 1.002(1,1.005)* |  | 0.906(0.589,1.396) |  | 0.984(0.959,1.01) |  | 0.98(0.955,1.005) |  | 0.974(0.948,1.002) |  | 1.006(0.946,1.069) |  | 0.973(0.938,1.01) |
| **Winter** | **Lag1** | 0.991(0.962,1.02) |  | 1.315(0.961,1.799) |  | 0.976(0.963,0.971)* | | 0.977(0.935,1.02) |  | 1.008(0.952,1.067) |  | 0.944(0.887,1.005) |  | 0.978(0.912,1.92) |
|  | **Lag2** | 0.999(0.997,1.001) |  | 1.395(1.188,1.673)* | | 1.008(0.954,1.065) |  | 1.001(0.959,1.046) |  | 0.866(0.745,0.996)* | | 0.995(0.935,1.059) |  | 0.139(0.001,35.733) |
|  | **Lag3** | 1(0.998,1.002) |  | 0.842(0.624,1.138) |  | 1.014(0.96,1.072) |  | 1.013(0.97,1.058) |  | 0.997(0.941,1.056) |  | 1.031(0.968,1.098) |  | 1.016(0.985,1.086) |
|  | **Lag4** | 1.001(0.999,1.003) |  | 0.789(0.584,1.065) |  | 0.974(0.922,1.03) |  | 0.982(0.941,1.026) |  | 0.965(0.911,1.022) |  | 1.005(0.944,1.069) |  | 0.15(0.001,37.962) |
|  | **Lag5** | 1.001(0.999,1.003) |  | 0.781(0.579,1.055) |  | 0.956(0.904,0.991)* | | 0.979(0.938,1.022) |  | 0.934(0.881,0.991) |  | 1.036(0.973,1.103) |  | 0.153(0.001,38.539) |
